# Supplementary material for: Glutathione-capped fluorescent gold nanoclusters for dual-modal fluorescence/X-ray computed tomography imaging
Source: Royal Society of Chemistry journal article supplement (doi:10.1039/c3tb20784f), 2013-01-01
Supplement: c3tb20784f.pdf [file c3tb20784f.pdf]

## **Glutathione-Capped Fluorescent Gold Nanoclusters for Dual-Modality Fluorescence/X-ray Computed Tomography Imaging**

**Chunlei Zhang,<sup>[a]</sup> Zhijun Zhou,<sup>[a]</sup> Qirong Qian,<sup>[b]</sup> Guo Gao,<sup>[a]</sup> Chao Li,<sup>[a]</sup> Lili  
Feng,<sup>[a]</sup> Qing Wang,<sup>[a]</sup> and Daxiang Cui\*<sup>[a]</sup>**

[a] National Key Laboratory of Nano/Micro Fabrication Technology, Key Laboratory for  
Thin Film and Microfabrication of Ministry of Education, Institute of Micro-Nano Science  
and Technology, Shanghai Jiao Tong University, Shanghai 200240, PR China

[b] Department of Surgery, Changzheng Hospital affiliated to Second Military Medical  
University, Fengyang Road 451, Shanghai 20003, PR China

Corresponding author. Tel/Fax: +86 21 34206886. E-mail: [dx cui@sjtu.edu.cn](mailto:dx cui@sjtu.edu.cn)

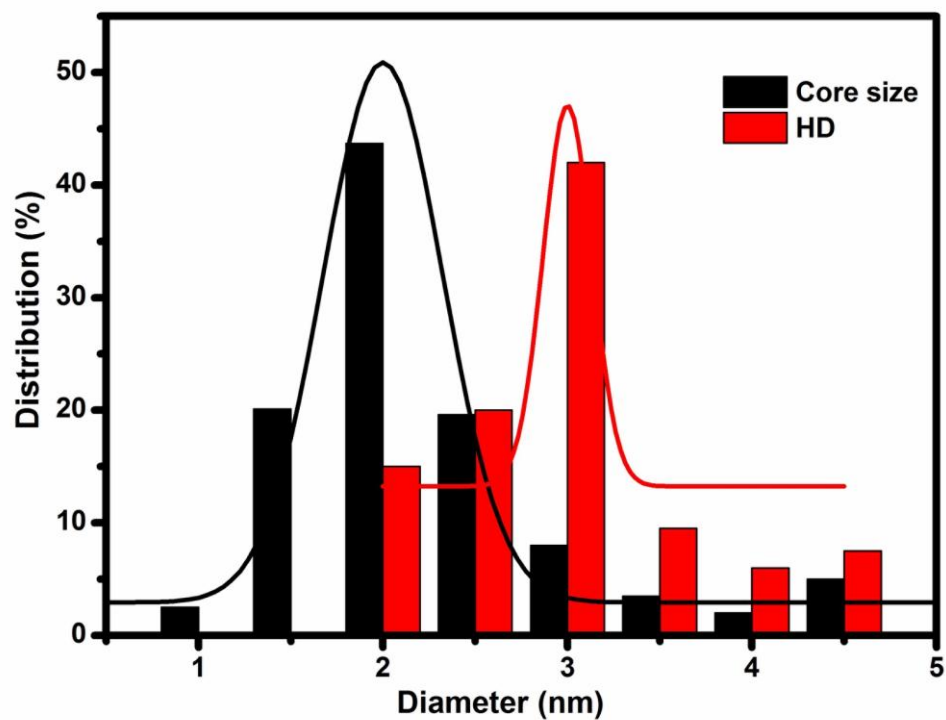

Figure S1. The core size of AuNCs@GSH is  $1.90 \pm 0.57$  nm, and dynamic light scattering analysis showing a hydrodynamic diameter (HD) of  $3.10 \pm 0.71$  nm in aqueous solution.

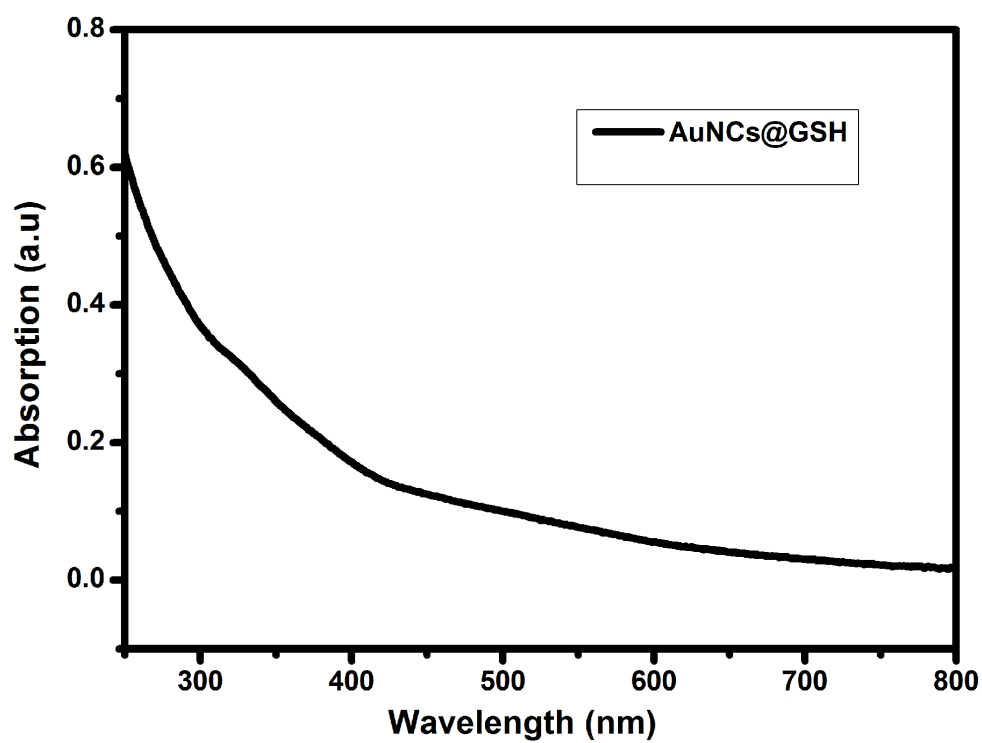

Figure S2. UV-vis spectra of AuNCs@GSH

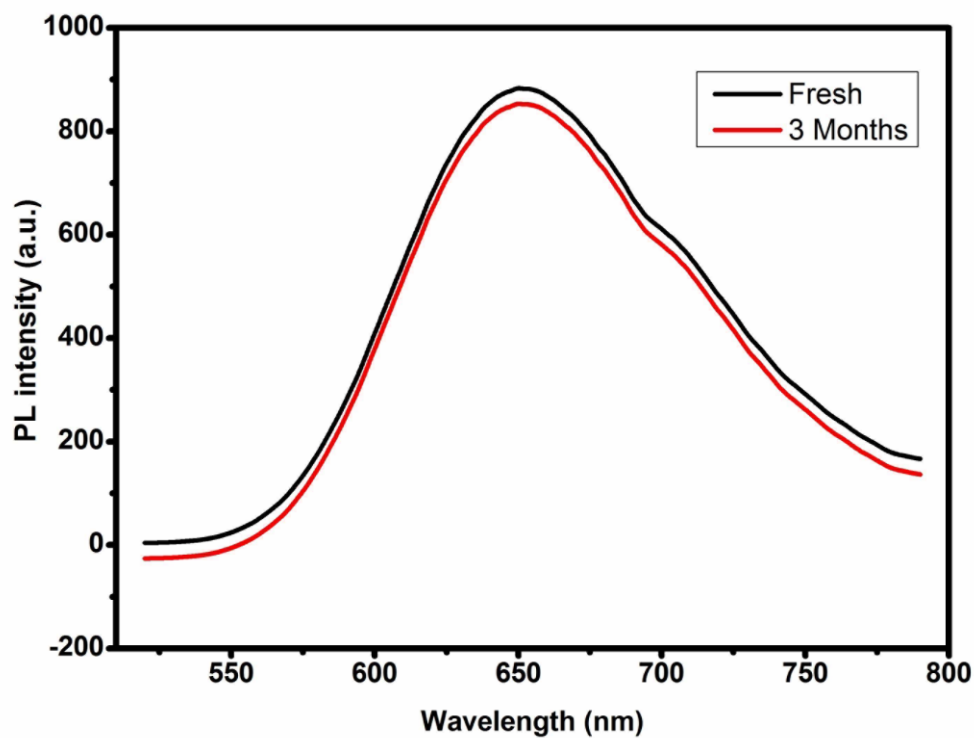

Figure S3. Fluorescence emission spectra of AuNCs@GSH in ultrapure water after fresh synthesis (black) and after storage 4°C for 3 months (red).

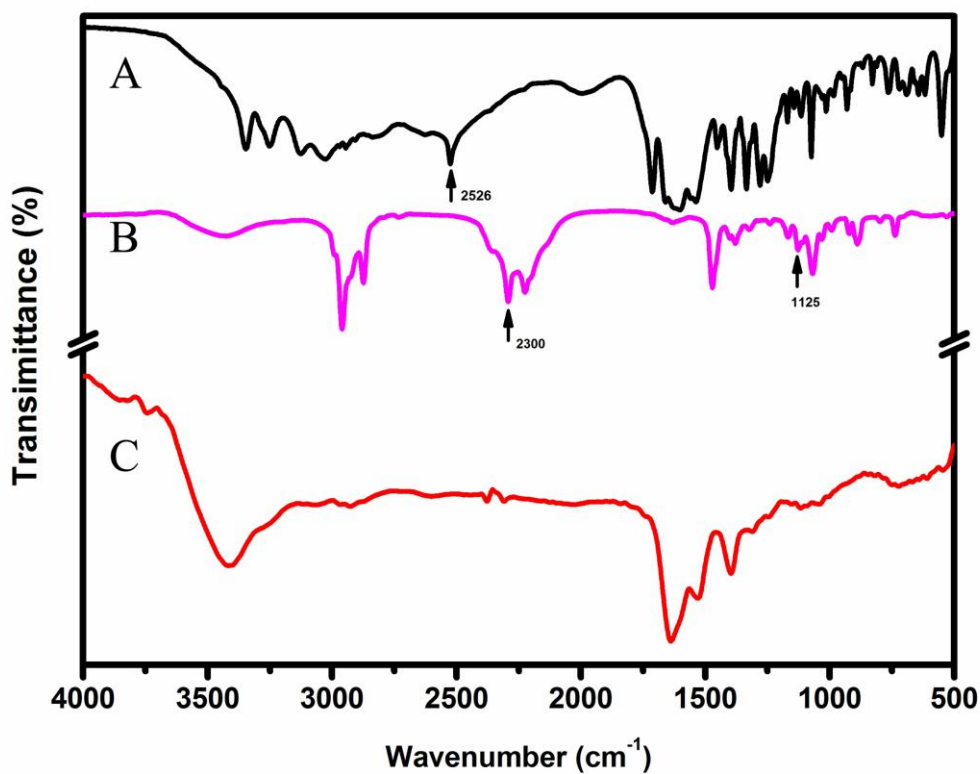

Figure S4. FTIR spectra of pure (a) GSH, (b) TBAB, and (c) AuNCs@GSH.
